# Supplementary material for: Optoelectronic Properties of Cold Plasma-Deposited, Oxidized Sn–C Thin Films
Source: MDPI journal article supplement (doi:10.3390/ma17020314), 2024-01-08
Supplement: s1 [file s1]

### *Electron affinity and ionization potential calculations*

Studies of the barrier heights at a metal-dielectric contact make it possible to calculate the electron affinity:

$$X = W_M - \Phi_{0e},$$

where  $W_M$  is the work function of the metal, and  $\Phi_{0e}$  is the barrier height for an electron. When the energy gap  $E_G$  is known, the value of  $X$ , in turn, enables estimating other parameters characterizing the energy structure as the ionization potential:

$$J = E_G + X.$$

The calculations for the contact between the metal electrode and insulating SnO<sub>2</sub>-C are consistent with a simple photoinjection model for a metal-insulator contact (Caywood 1970). On the base of this model, the barrier to hole injection from the metal into the insulator  $\Phi_{0h}$  is the ionization energy  $J$  minus the metal work function  $W_M$ :

$$\Phi_{0h} = J - W_M;$$

the barrier to electron injection  $\Phi_{0e}$  is  $W_M$  minus the electron affinity  $X$ :

$$\Phi_{0e} = W_M - X,$$

and the sum of these two barriers,  $\Phi_{0e}$ , and  $\Phi_{0h}$ , constitutes the energy gap  $E_G$ :

$$\Phi_{0e} + \Phi_{0h} = E_G.$$

Using the determined contact barrier heights for electrons and holes (Table 2) and also the values of the work functions of Au and Al, it was estimated that  $J = 7.3$  eV and  $X = 2.1$  eV. Considering the barrier heights for holes and electrons as well as the values of the electron affinity and ionization potential, an energy levels scheme for SnO<sub>2</sub>-C for insulating films can be constructed.

Caywood, J.M. Photoemission from Metal Contacts into Anthracene Crystals: A Critical Review. *Mol. Cryst. Liquid. Cryst.* **1970**, 12, 1-16, doi: 10.1080/15421407008082756.
